# Supplementary material
Source: Springer Nature journal article supplement (https://www.springermedizin.de/resource/supplementary/13024_2014_540_MOESM6_ESM.pdf/9644348)
Supplement: MOESM6 [file 9644348]

**Table S1: Mouse number and gender used in each experiment.**

| Figure number    | B16                           |         |                              | B16/129sv                     |         |                               |
|------------------|-------------------------------|---------|------------------------------|-------------------------------|---------|-------------------------------|
|                  | WT                            | Het     | KO                           | WT                            | Het     | KO                            |
| <b>1</b>         | 22 (10F)                      | 13 (5F) | 18 (9F)                      | 26 (16F)                      | 15 (8F) | 26 (13F)                      |
| <b>2-6, S1-5</b> | 10 (1F)                       | 10 (8F) | 12 (7F)                      | 11 (5F)                       | 9 (6F)  | 11 (4F)                       |
| <b>7a-d</b>      | Sham 10<br>(4F);<br>L-DOPA 11 | N/A     | Sham 9<br>(6F);<br>L-DOPA 10 | Sham 10<br>(6F);<br>L-DOPA 10 | N/A     | Sham 10<br>(5F);<br>L-DOPA 10 |
|                  | (7F)                          |         | (2F)                         | (5F)                          |         | (8F)                          |
| <b>7e</b>        | 5 (1F)                        | 5 (3F)  | 5 (2F)                       | 5 (3F)                        | 5 (3F)  | 5 (2F)                        |
| <b>8</b>         | 22 (7F)                       | 10 (8F) | 22 (13F)                     | 11 (5F)                       | 9 (6F)  | 11 (4F)                       |
